# Spalacopus cyanus.

By Juan C. Torres-Mura and Luis C. Contreras

Published 4 December 1998 by the American Society of Mammalogists

## Spalacopus Wagler, 1832

*Spalacopus* Wagler, 1832:1219. Type species *S. poeppigii* Wagler, 1832.

*Poephagomys* Cuvier, 1834:323. Type species *P. ater* Cuvier, 1834.

*Psammorectes* Poepig, 1835b:252. Type species *P. noctivagus* Poepig, 1835b.

**CONTEXT AND CONTENT.** Order Rodentia, Superfamily Octodontoidea, Family Octodontidae. *Spalacopus* includes one species, *Spalacopus cyanus* (Woods, 1993).

## Spalacopus cyanus (Molina, 1782)

### Cururo

*Mus cyanus* Molina, 1782:300. Type locality "Valparaíso," Chile by subsequent selection (Osgood, 1943:114).

*Spalacopus poeppigii* Wagler, 1832:1219. Type locality "foot of the Andes" in central Chile (erroneously fixed at coastal Quintero by Thomas, 1925).

*Poephagomys ater* Cuvier, 1834:323. Type locality "Coquimbo," Chile.

*Psammorectes noctivagus* Poepig, 1835a:166. Type locality "sand dunes near Concón," Valparaíso, Chile (not from coast of northern Chile as in Osgood (1943:114)).

*Spalacopus tabanus* Thomas, 1925:585. Type locality unknown, but in southern Chile.

*Spalacopus cyanus* Osgood, 1943:114. First use of current name combination and spelling.

**CONTEXT AND CONTENT.** Three subspecies currently are recognized (Tamayo and Frassinetti, 1980; Contreras et al., 1987).

*S. c. cyanus* (Molina, 1782), see above (*ater* Cuvier and *noctivagus* Poepig are synonyms).

*S. c. poeppigii* Wagler, 1832, see above (*tabanus* Thomas is a synonym).

*S. c. maulinus* Osgood, 1943:115. Type locality Quirihue, Ñuble, Chile.

**DIAGNOSIS.** *Spalacopus cyanus* is a burrowing rodent of moderate size, with a mass of <140 g, a short tail (41 mm), short ears (10 mm), and black in color (Fig. 1). Of all octodontids species,

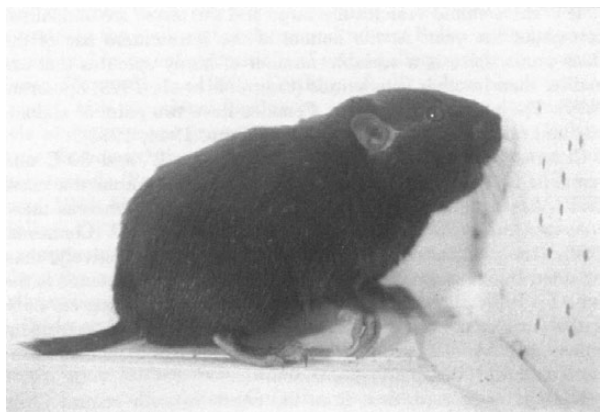

FIG. 1. Male *Spalacopus cyanus* from Lagunillas, Andes of central Chile.

only *Aconaemys* is moderate sized with a short tail, but it is brownish and has larger ears. Chilean species of the fossorial genus *Ctenomys* (Ctenomyidae) are larger than 140 g and are brown in color. Upper incisors of *Spalacopus* are long and protrude forward; all other octodontids have orthodont or opisthodont incisors. Grinding teeth are quadrate with a single deep indentation on lingual and labial sides, separated in the middle by a slight space; in *Aconaemys* indentations meet in the middle.

**GENERAL CHARACTERS.** Adults range in mass from 80 to 120 g; those from low altitudes are smaller and show more sexual dimorphism than do those from high Andean localities (Contreras, 1986). Mean measurements (in mm, ranges in parenthesis) for males and females respectively, for *S. c. cyanus* ( $n = 74$  and  $72$ ) are as follows: total length, 176 (155-205), 170 (142-204); length of tail, 41 (31-50), 39 (28-49); length of hindfoot, 28 (21-33), 28 (23-31); length of ear, 10 (8-12), 10 (8-12); mass (in g), 81 (53-105), 73 (43-119). The same measurements for *S. c. poeppigii* ( $n = 30$  and  $29$ ) are as follows: total length, 188 (162-224), 190 (160-225); length of tail, 47 (39-55), 48 (39-57); length of hindfoot, 30 (27-34), 30 (24-37); length of ear, 11 (10-12), 11 (8-12); mass, 105 (68-151), 97 (60-163). Body measurements for *S. c. maulinus* ( $n = 10$  and  $10$ ) are the following: total length, 172 (140-195), 167 (160-176); length of tail, 39 (30-43), 38 (35-43); length of hindfoot, 28 (26-34), 26 (25-28); length of ear, 10 (9-11), 11 (9-12); mass, 87 (64-130), 84 (71-102). The pelage is black, dense, and short (12 mm). Some specimens have white patches, especially in the ventral region. The eyes are small, usually 5.5 mm in diameter. The forefeet are strong, with long claws. The dental formula is  $i\ 1/1, c\ 0/0, p\ 1/1, m\ 3/3$ , total 20. The incisors are long and very procumbent with a Thomas angle (a measure of the degree of procumbency of upper incisors—Thomas, 1919) of  $117^\circ$ , similar to the  $120^\circ$  of *Heterocephalus* (Reig and Quintana, 1992). The alveoli of the upper incisors are large, extending to the second M1, a condition typical of tooth-diggers (Lessa and Thaler, 1989). As extensions of upper and lower lips are almost fused behind the I1, the mouth can be closed while digging with the teeth. The molariform teeth grow continuously and exhibit single indentations in the lingual and labial surfaces that produce a figure-eight shape typical of most octodontids (Fig. 2—Mann, 1978; Osgood, 1943).

**DISTRIBUTION.** The cururo occurs in Chile, in coastal regions from Caldera ( $27^\circ 03'S$ ) to Quirihue ( $36^\circ 17'S$ ), in the Andes up to 3,500 m, from Alicahue ( $32^\circ 19'S$ ) to Los Cipreses ( $34^\circ 01'S$ ), and at scattered localities on the slopes of the intervening Intermediate Depression (Fig. 3—Contreras et al., 1987). *S. c. maulinus* is found in Cauquenes and Quirihue, Ñuble Province (the two most southern localities in Fig. 3). *S. c. cyanus* occurs in central Chile, from Caldera ( $27^\circ S$ ) to Curicó ( $35^\circ S$ ), and from sea level to 1,000 m altitude; and *S. c. poeppigii* occurs in the Andes of central Chile, at elevations of 1,500-3,400 m above sea level. There are gaps in the known geographic distribution of *Spalacopus cyanus*, especially between  $34^\circ$  and  $36^\circ S$ , probably because of the lack of sampling effort rather than absence of the species.

**FOSSIL RECORD.** There is no fossil record of *Spalacopus*. Reig (1970) referred fossils of the fossorial octodontoids *Eucelophorus*, *Actenomys*, and *Xenodontomys* from Argentina to *Ctenomys* (Ctenomyidae, sensu Woods, 1982), rejecting a close relationship with *S. cyanus*. Reig (1970) suggested *S. cyanus* originated prior to (and independent of) *Ctenomys*. Contreras et al. (1987) suggested *Spalacopus* speciated in situ during the Pleistocene. The only subfossil record consists of Late Pleistocene remains found in archaeological excavations in Tagua-Tagua, Region VI (R. Feito, in litt.).

**FORM AND FUNCTION.** Fossorial adaptations of *S. cyanus*

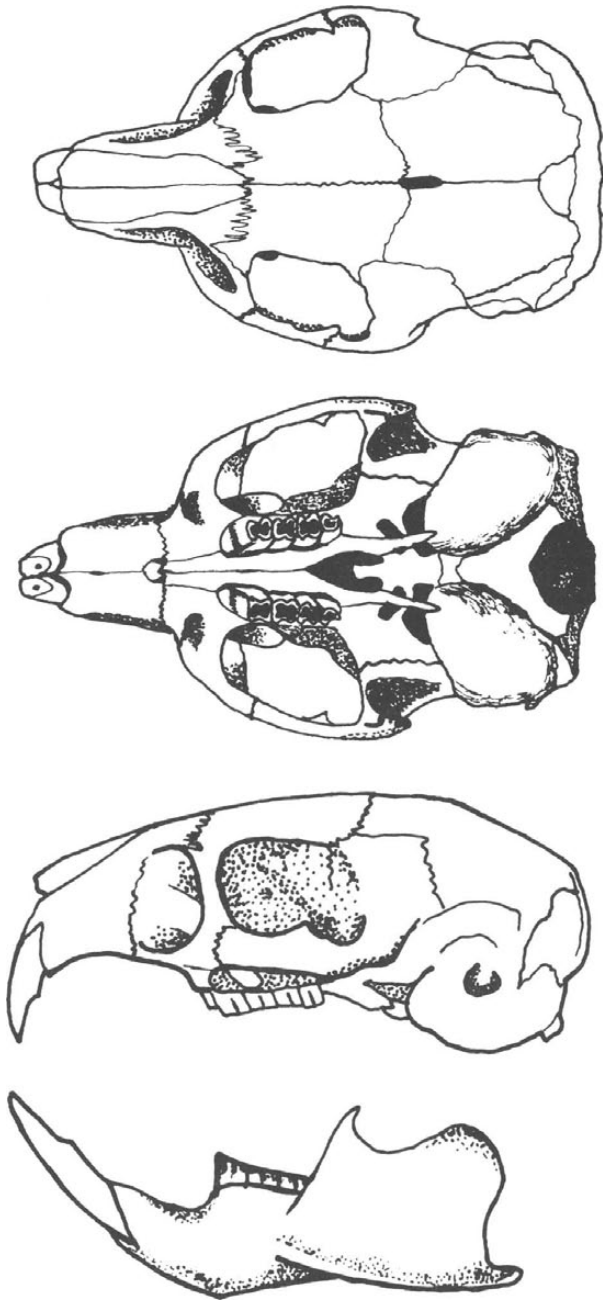

FIG. 2. Dorsal, ventral and lateral views of the skull and lateral view of mandible of *Spalacopus cyanus* from Perales, Vallenar, Chile (female, J. C. Torres-Mura number 601). Greatest length of cranium is 35.0 mm. Illustration by Marina Lemus.

are evident from its small thickset body, short tail, short ears, small dorsally situated eyes, short limbs, wide feet, and long claws. These features yield a Fossorial Index of 5.1, similar to that of *Ctenomys haigi* (Pearson, 1984). The skull is robust, short, wide, and flat, with highly procumbent upper incisors (Fig. 2). The nasal region is short. In contrast to *Ctenomys*, the auditory bullae of *Spalacopus* are small. The angular process of the mandible is large, as are the masseter muscles. As in *Octodon* and *Aconaemys*, the incus and malleus are not fused (Wood and Patterson, 1959). The tibia and fibula are fused proximally (Landry, 1957). A well-developed delto-crest of the humerus permits powerful movements of the forelimbs. The clavicle is wide distally and narrow and thin proximally. The femur has an enlarged third trochanter, as in *Octodon degus* (Mann, 1940). Lateral views of skull, mandible, and pelvis, and anterior and lateral views of humerus, femur, and tibia of *S. cyanus* are depicted in Reig and Quintana (1992) as part of a comparison with fossil ctenomyine *Euclaphorus*.

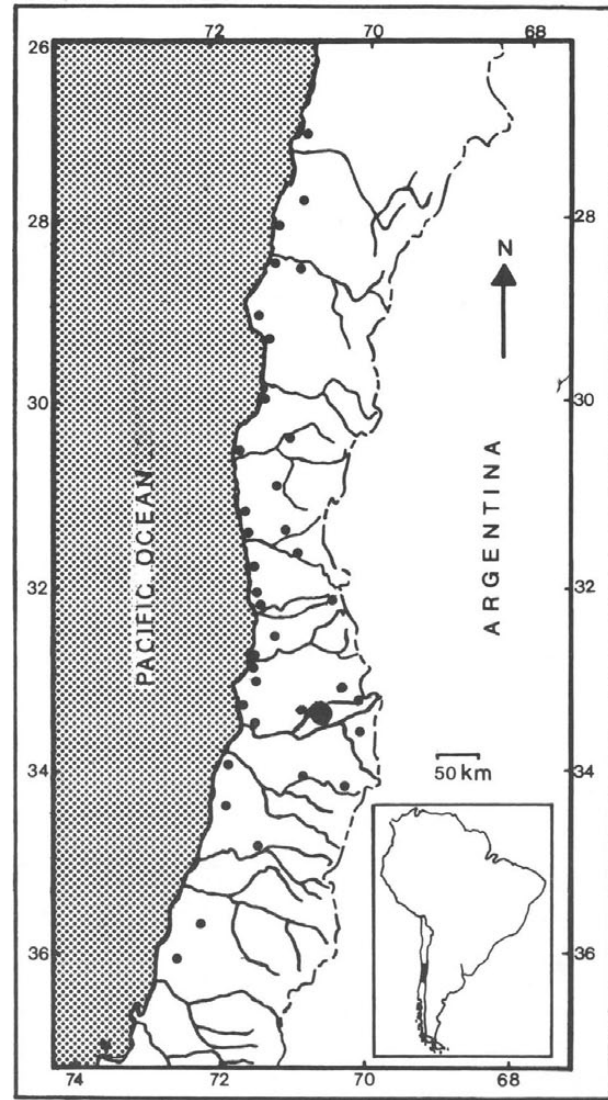

FIG. 3. Map of Central Chile showing the geographic distribution of *Spalacopus cyanus*. Large symbol indicates the position of Santiago, Chile (33°27'S, 70°38'W, 600 m). The two southernmost localities belong to *S. c. maulinus*. The five localities along the Andes and close to the Argentinian border belong to *S. c. poeppigii*. Other localities are for *S. c. cyanus*.

The stomach of *Spalacopus cyanus* is simple, with a large fundulus and a small and simple cecum. The simplicity of the digestive system reflects a diet low in cellulose and easily digested (Mann, 1940). The seminal vesicles are large and the testes are abdominal throughout the year. At the bottom of the intromittent sac of the glans penis there is a variable number of horny spicules that are smaller than in other octodontids (Contreras et al., 1993; Spotorno, 1979). The uterus is bicornate. Females have two pairs of abdominal and one pair of inguinal nipples (Mann, 1944, 1978).

Cururos are good thermoregulators between 2° and 30°C and maintain a body temperature of 36.5°C. Animals from the coast have a basal metabolic rate of 0.745 ml O<sub>2</sub> g<sup>-1</sup>h<sup>-1</sup>, whereas those from the Andes have a rate of 0.956 ml ml O<sub>2</sub> g<sup>-1</sup>h<sup>-1</sup> (Contreras, 1986). These values are 85% and 74% lower, respectively, than expected based on body mass. Minimal thermal conductance is the same for individuals from both populations, representing ca. 85% of that expected based on mass. These values are in agreement with typical bioenergetic patterns of subterranean mammals (Contreras and McNab, 1990).

Kidneys of *S. c. cyanus* from the coast in north central Chile have a relative medullar thickness value of 4.9, and a percentage medullar thickness of 63.9%. These values are significantly lower than those from the Andes (*S. c. poeppigii*), with 6.0 and 68.4

respectively—reflecting a longer renal papilla in *S. c. poeppigii* (Cortés, 1985).

**ONTOGENY AND REPRODUCTION.** Gay (1847) and Molina (1782) stated that *Spalacopus cyanus* reproduces twice a year, with litters of up to six individuals. Examination of 75 animals, however, indicates an average litter size of 2.2 (range, 1–3—Lagos et al., 1989). According to Housse (1953), neonates are black and naked and open their eyes 10–12 days after birth. Our observations of two captive litters revealed they are haired and open their eyes at birth. Unda et al. (1980) found corpora lutea and germinative lines in all months sampled. They proposed the existence of a reproductive period from June to March in coastal populations and a shorter period in Andean populations. A male to female ratio of 1:0.88 was found for 224 specimens captured in various localities over the past 10 years (Lagos et al., 1989).

**ECOLOGY.** Habitats occupied by *S. cyanus* range from alpine grasslands in the Andes to acacia savanna in the Intermediate Depression and stabilized sand dunes and sandy grasslands on the coast. Shrub cover is <60%, with an herb stratum that contains geophytes and hemicryptophytes (Contreras et al., 1987).

Cururos maintain and expand an extensive system of tunnels ranging from 5 to 7 cm in diameter. The majority of these tunnels lie 10–12 cm below the surface and are used for feeding. These tunnels have numerous lateral tunnels opening to the surface. They are used for depositing soil on the surface, thereby forming conspicuous heaps, and also for feeding on vegetation around tunnel openings. Feeding tunnels undergo continuous modification. A second type of tunnel is found 40–60 cm below ground surface. These are shorter than feeding tunnels but are used for longer periods. Within these deep tunnels usually there is a nest chamber and a bolt hole (Reig, 1970; Torres-Mura, 1990). Nests are 20 cm in diameter, lined with grasses, and kept free of feces; however, they often also serve as homes for staphilinid coleopterans and isopods (Torres-Mura, 1990). Harvesting of geophytes through tunneling appears to be the primary mode of foraging throughout the year, as suggested by the volume of soil deposited in surface heaps. In arid mediterranean habitats of Chile, the monthly rate of mound production by one colony was variable, with an average of  $64 \pm 23$  (mean  $\pm$  SD) heaps/month (range, 9–110). However, the volume of soil deposited on the surface was less variable and unrelated to precipitation. The cumulative volume of soil deposited on the surface was equal to 2.5 m<sup>3</sup>/year and the total soil mass equal to 3.22 metric tons/year, at a bulk density of 1.31 g/cm for mined soil. The surface area directly covered by heaps was 92.4 m<sup>2</sup>/year. At a density of 3 colonies/ha, this would equal about 10 tons/ha (Contreras et al., 1993).

Reig (1970) stated that this species is nocturnal, but Ipinza et al. (1971) considered it to be diurnal. Surface soil deposition and captures in traps only occur during the daytime, although continuous measurements of metabolic rate indicate no circadian or photoperiodic rhythm, a pattern typical of other subterranean mammals (Contreras, 1986).

According to Ipinza et al. (1971), the cururo is strictly herbivorous, feeding on tubers of iridaceas (e.g., *Libertia*, *Sisyrinchium*, *Alophia*). However, Reig (1970) reported that the cururo on the coastal dunes feeds exclusively on huilli (*Leucocoryne ixiooides*), consuming the stalk and underground tubers. Bulbs of *Rodophiala* were found in recent excavations of seven gallery systems in coastal dunes (Torres-Mura, 1990). Feeding usually takes place underground, with occasional feeding on aerial herbs around open tunnels at distances no greater than the animal's body length. Unlike some *Ctenomys*, they do not venture away from the entrance of their tunnels (Pearson et al., 1968). Many authors (Gay, 1847; Gigoux, 1945; Housse, 1953; Ipinza et al., 1971; Mann, 1944, 1978; Molina, 1782; Reed, 1892) state that this species stores geophytes underground and uses them as food reserves, especially in regions where the ground is covered by snow during winter. However, no substantiating data were included in any of these reports.

Predators of the cururo include snakes, buzzards (*Buteo*), Harris' hawks (*Parabuteo unicinctus*), American kestrels (*Falco sparverius*), great horned owls (*Bubo virginianus*), gray foxes (*Pseudalopex griseus*), grisons (*Galictis cuja*), and pampas cats (*Oncifelis colocolo*—Housse, 1953; Mann, 1978). Quantitative analysis of food habits for 10 common species of predators in central Chile indicated low predation pressure on the cururo (Jaksic et al., 1981).

The nematode *Graphidioides yanesi* specifically parasitizes the intestines of *Spalacopus* (Babero and Cattán, 1980). Similarly, the flea *Ectinorus cocyi* (Siphonaptera) is a specific parasite of *S. cyanus*, whereas other species of *Ectinorus* parasitize *Octodon degus* and other rodents (J. C. Beaucourou, in litt.).

Cururos cause damage in agricultural areas by burrowing and by consuming potatoes and other crops. The tunnels of this species are dangerous to horses and cattle, which may fall and break their legs when stepping into them (Housse 1953; Miller and Rottmann, 1976). Burrowing activities by *S. cyanus* have great impact on the biomass of herbaceous vegetation in coastal habitats. In areas with burrows, biomass was 60% higher than in areas without burrows, due mainly to a large increase of early successional herbs (Contreras and Gutiérrez, 1991). The biomass of geophytes which are eaten by *S. cyanus* does not differ between areas with or without burrows. However, in areas with burrows, geophytes are more numerous and smaller. Burrowing activities possibly facilitate the presence of new small bulbs by promoting seed germination. Species composition and diversity of herbs do not differ between areas with and without burrows (Contreras and Gutiérrez, 1991). Digging activities, as indicated by the rate of mound production, in coastal habitats are greater in the rainy season (austral winter) than during the summer dry season (Torres-Mura, 1990).

Home ranges of individual cururos are similar to the home range of the whole colony and have a mean of 40.3 m<sup>2</sup> (range, 24.3–61.8) based on the minimal convex polygon method. Home-range dimensions were determined by radioactive tagging and tunnel system excavation. These values are similar to those of other subterranean rodents with similar body size, such as *Thomomys bottae* and *Tachyoryctes splendens* (Torres-Mura, 1990).

**BEHAVIOR.** *Spalacopus cyanus* lives in colonies of as many as 15 individuals, consisting of a family group of one to several pairs and their young (Housse, 1953; Ipinza et al., 1971). Tactile communication in the form of nose-to-nose contact often is used in social interactions. This contact is followed by exploratory behavior including smelling the perineum, haunch, and neck (Kleiman, 1974). Urine possibly is used in intraspecific communication such as marking a territory (Torres-Mura, 1990). *S. cyanus* is one of the few caviomorphs that uses a specialized posture to urinate, raising a leg while urinating on vertical surfaces (Kleiman, 1974).

The most characteristic call of *S. cyanus* is a musical song with descending frequencies and duration of 300–8,000 msec, with audible frequencies of 0.9–1.2 kHz (Eisenberg, 1974). This vocalization is used as a warning call for colony members, and can be heard easily when their activities are disturbed in the field or laboratory. Tooth chattering frequently is produced by dominant individuals when an unfamiliar animal is introduced into an experimental arena (Torres-Mura, 1990). Colonies of *S. cyanus* exhibit a regular pattern of spatial distribution. This pattern, together with a high level of intercolonial aggressiveness, was interpreted as evidence of territorial behavior (Torres-Mura, 1990).

Cururos can swim short distances with no difficulty, using strong movements of hind and forelegs and with nose, eyes, and ears always above of water (Hickman, 1988; Reise and Gallardo, 1989a). Behavior upon encountering water differs between northern and southern populations. Water seems to be a strange element for northern cururos, but southern cururos have no difficulties entering water (Reise and Gallardo, 1989a).

**GENETICS.** The diploid (2n = 58) and fundamental numbers (FN = 116) are the same in five different populations of *S. cyanus* from the coast and the Andes (Reig et al., 1972). The diploid and fundamental numbers are the same as those of *Octodon degus* and *O. bridgesi* (Contreras et al., 1990, 1994). Further, the C- and G-banded karyotypes of coastal and mountain populations of *S. cyanus* are similar in most respects. *S. cyanus* differs from *O. degus* in exhibiting paracentromeric C-bands in the X chromosome and by the absence of an extra heterochromatic zone on pair 1 (Gallardo 1992; Zulch et al., 1982). Lack of species diversity in the genus *Spalacopus* has been attributed to enhanced gene flow among colonies as a result of searching for bulbs of geophytes (Reig, 1970; Reig et al., 1972). However, studies of home ranges by radioactive tagging indicate these colonies are relatively stable (Torres-Mura, 1990). Also, restricted swimming abilities of some populations may be a factor that hampers migration (Reise and Gallardo, 1989a). Data on karyology (Contreras et al., 1994) and morphology of the

glans penis (Contreras et al., 1993) demonstrate similarities between octodontid taxa inhabiting the southwestern Andes (*Aconaemys*, *Octodon*, *Spalacopus*) and suggest close evolutionary relationships among them, possibly as a result of isolation and radiation on the Chilean side.

**CONSERVATION STATUS.** In the Red List of Chilean Terrestrial Vertebrates, *S. c. maulinus* was qualified as "Endangered" (CONAF, 1993). Since the description of this subspecies by Osgood (1943), the only reports on its biology are those by Reise and Gallardo (1989a, 1989b).

**REMARKS.** The generic name *Spalacopus* is derived from the greek *spalax* meaning a mole and the greek *pous* (Jaeger, 1978) meaning a foot, in reference to adaptations of its feet for a fossorial life style. The specific name *cyanus* is derived from the greek *kyaneos* meaning a dark blue, although it refers to the cururo's shiny black pelage (Jaeger, 1978). The subspecies name *poepigii* is a patronymic of German naturalist Eduard Poeppig and *maulinus* to the Maule region, although at present the type locality of this subspecies is in the Ñuble region.

The name cururo seems to have a double meaning. It is an onomatopoeia of the most characteristic vocalization of the species and also is similar to the mapuche or araucarian (mapudungun) word *curi* or *curu*, meaning black. The name *cuyu* also is used in the southern end of its distribution and relates to the word *cuyul*, meaning charcoal. According to Molina (1782), the name *guanque* would apply to cururos, but this may be a mistake or confusion. Guanque is the common name of the bulbs of dioscoreaceas that cururos store in certain regions and that peasants obtain for food by digging out cururo galleries.

The best method to trap cururos alive is by use of thin wire snares placed at the entrance of their burrows. Snares must be checked frequently to avoid injuries. This work was supported by grants FONDECYT Chile 90/376, DIULS 120-3-35, and Dirección de Bibliotecas, Archivos y Museos 92/15.

#### LITERATURE CITED

- BABERO, B. B., AND P. CATTAN. 1980. Helminthofauna de Chile: VIII. *Graphidioides yanesi* sp. n. Parásito de *Spalacopus cyanus* Molina (Nematoda, Trichostrongylidae). Boletín del Museo Nacional Historia Natural, Chile, 37:225-228.
- CONTRERAS, L. C. 1986. Bioenergetics and distribution of fossorial *Spalacopus cyanus* (Rodentia): thermal stress, or cost of burrowing? *Physiological Zoology*, 59:20-28.
- CONTRERAS, L. C., AND J. R. GUTIÉRREZ. 1991. Effects of the subterranean herbivorous rodent *Spalacopus cyanus* on herbaceous vegetation in arid coastal Chile. *Oecologia*, 87:106-109.
- CONTRERAS, L. C., AND B. K. MCNAB. 1990. Thermoregulation and energetics of subterranean mammals. Pp. 231-25, in *Evolution of subterranean mammals at the molecular and individual level* (E. Nevo and O. Reig, eds.). Alan R. Liss Inc., New York, 678 pp.
- CONTRERAS, L. C., J. C. TORRES-MURA, AND A. SPOTORNO. 1990. The largest known chromosome number for a mammal, in a South American desert rodent. *Experientia*, 46:506-508.
- CONTRERAS, L. C., J. C. TORRES-MURA, AND J. YÁÑEZ. 1987. Biogeography of octodontid rodents: an eco-evolutionary hypothesis. Pp. 401-411, in *Studies in Neotropical mammalogy: Essays in honor of Philip Hershkovitz*. (B. D. Patterson and R. M. Timm, eds.). *Fieldiana: Zoology*, new series, 39:1-496.
- CONTRERAS, L. C., J. R. GUTIÉRREZ, V. VALVERDE, AND G. W. COX. 1993. Ecological relevance of subterranean herbivorous rodents in semiarid coastal Chile. *Revista Chilena de Historia Natural*, 66:357-368.
- CONTRERAS, L. C., J. C. TORRES-MURA, A. SPOTORNO, AND F. CATZ-EFLIS. 1993. Morphological variation of the glans penis of South American octodontid and abrocomid rodents. *Journal of Mammalogy*, 74:926-935.
- CONTRERAS, L. C., J. C. TORRES-MURA, A. SPOTORNO, AND L. I. WALKER. 1994. Chromosomes of *Octomys mimax* and *Octodontomys gliroides*, and the relationships of octodontid rodents. *Journal of Mammalogy*, 75:768-774.
- CORPORACIÓN NACIONAL FORESTAL (CONAF). 1993. Red list of Chilean terrestrial vertebrates. (A. Glade, ed.). Proceedings of the Symposium "Conservation status of Chilean terrestrial vertebrate fauna." Corporación Nacional Forestal, Santiago, 67 pp.
- CORTES, A. 1985. Adaptaciones fisiológicas y morfológicas de pequeños mamíferos de ambientes semiáridos. M.S. thesis, Universidad de Chile, 121 pp.
- CUVIER, G. 1834. *Poepigomys ater*. *Annales du Sciences Naturelles, Zoologie*, 1:323-326.
- EISENBERG, J. F. 1974. The function and motivational basis of hystricomorph vocalizations. Symposium of the Zoological Society of London, 34:211-247.
- GALLARDO, M. H. 1992. Karyotypic evolution in octodontid rodents based on C-bands analysis. *Journal of Mammalogy*, 73: 89-98.
- GAY, C. 1847. Historia física y política de Chile. *Zoología*, Tomo I. Imprenta Maulde & Renou, Paris, 182 pp.
- GIGOUX, E. 1945. El cururo. *Revista Universitaria*, 10:95-97.
- HICKMAN, G. C. 1988. The swimming ability of *Ctenomys fulvus* (Ctenomyidae) and *Spalacopus cyanus* (Octodontidae), with reference to swimming in other subterranean mammals. *Zeitschrift für Säugetierkunde*, 53:11-21.
- HOUSSE, R. 1953. *Animales salvajes de Chile en su clasificación moderna*. Ediciones de la Universidad de Chile, Santiago, 189 pp.
- IPINZA, J., M. TAMAYO, AND J. ROTTMANN. 1971. Octodontidae en Chile. *Noticiario Mensual, Museo Nacional de Historia Natural, Chile*. 16(183):3-10.
- JAEGER, E. C. 1978. A source-book of biological names and terms. Third ed. Charles C Thomas, Publisher, Springfield, Illinois, 323 pp.
- JAKSIC, F. M., H. W. GREENE, AND J. L. YÁÑEZ. 1981. The guild structure of a community of predatory vertebrates in central Chile. *Oecologia*, 49:21-28.
- KLEIMAN, D. G. 1974. Patterns of behaviour in hystricomorph rodents. Symposium of the Zoological Society of London, 34: 171-209.
- LACOS, V., J. C. TORRES-MURA, J. YÁÑEZ, AND L. C. CONTRERAS. 1989. Estrategia reproductiva del roedor subterráneo *Spalacopus cyanus*. Resúmenes I Congreso de Estudiantes de Ciencias Biológicas de Chile, Universidad de Talca, Talca, D-33.
- LANDRY, S. C., JR. 1957. The interrelationships of the New and Old World hystricomorph rodents. *University of California Publications in Zoology*, 56:1-118.
- LESSA, E., AND C. S. THAEFLER. 1989. A reassessment of morphological specializations for digging in pocket gophers. *Journal of Mammalogy*, 70:689-700.
- MANN, G. 1940. Contribución a la anatomía de los Octodóntidos. Boletín del Museo Nacional de Historia Natural, Chile, 19: 83-106.
- . 1944. Contribución al conocimiento de los mamíferos chilenos. Veterinary Medicine thesis, Universidad de Chile, Santiago, 365 pp.
- . 1978. Los pequeños mamíferos de Chile. *Gayana, Zoología*, 40:1-342.
- MILLER, S. D., AND J. ROTTMANN. 1976. Gufa para el reconocimiento de mamíferos chilenos. Editorial Gabriela Mistral, Santiago, 200 pp.
- MOLINA, J. I. 1782. *Saggio sulla storia naturale del Chile*. Aquino, Bologna, 368 pp.
- OSGOOD, W. H. 1943. The mammals of Chile. *Field Museum of Natural History, Zoological Series*, 30:1-268.
- PEARSON, O. P. 1984. Taxonomy and natural history of some fossorial rodents of Patagonia, southern Argentina. *Journal of Zoology (London)* 202:225-237.
- PEARSON, O. P. ET AL. 1968. Estructura social, distribución espacial y composición por edades de una población de tuco-tucos (*Ctenomys talarum*). *Investigaciones Zoológicas Chilenas*, 8:47-80.
- POEPPIG, E. 1835a. Reise in Chile, Perú und auf dem Amazonenstrom während der Jahre 1827-1830. *Fleischer*, Leipzig, 466 pp.
- . 1835b. Über den Cucurrito Chile's (*Psammorectes noctivagus* Poepp.). *Archiv für Naturgeschichte*, 1:252-255.
- REED, E. C. 1892. *Compendio de historia natural de Chile*. Imprenta Gutemberg, Santiago, 117 pp.
- REIG, O. 1970. Ecological notes on the fossorial octodont rodent *Spalacopus cyanus* (Molina). *Journal of Mammalogy*, 51:592-601.

- REIC, O., AND C. A. QUINTANA. 1992. Fossil ctenomyine rodents of the genus *Eucelophorus* (Caviomorpha: Octodontidae) from the Pliocene and Early Pleistocene of Argentina. *Ameghiniana*, 29:363–380.
- REIC, O., A. SPOTORNO, AND R. FERNÁNDEZ. 1972. A preliminary survey of chromosomes in populations of the Chilean burrowing octodont rodent *Spalacopus cyanus* Molina (Caviomorpha, Octodontidae). *Biological Journal of the Linnean Society*, London, 4:29–38.
- REISE, D., AND M. GALLARDO. 1989a. Intraspecific variation in facing-water behaviour of *Spalacopus cyanus* (Octodontidae, Rodentia). *Zeitschrift für Säugetierkunde*, 54:331–333.
- . 1989b. Biology of the Cururo *Spalacopus cyanus matulinus*, Osgood (Rodentia, Octodontidae) from Chile. Abstracts of the Fifth International Theriological Congress, 1:33–34.
- SPOTORNO, A. 1979. Contrastación de la macrosistemática de roedores caviomorfos por análisis comparativo de la morfología reproductiva masculina. *Archivos de Biología y Medicina Experimentales*, 12:97–106.
- TAMAYO, M., AND D. FRASSINETTI. 1980. Catálogo de los mamíferos fósiles y vivientes de Chile. *Boletín del Museo Nacional de Historia Natural*, Chile, 37:323–399.
- THOMAS, O. 1919. The method of taking the incisive index in rodents. *Annals and Magazine of Natural History*, 9:289–290.
- . 1925. On some Argentine mammals. *Annals and Magazine of Natural History*, 9:582–585.
- TORRES-MURA, J. C. 1990. Uso del espacio en el roedor fosorial *Spalacopus cyanus* (Octodontidae). M.S. thesis, Universidad de Chile, 64 pp.
- UNDA, C., M. A. ROJAS, AND J. YÁÑEZ. 1980. Estudio preliminar del ciclo reproductivo y efecto medioambiental en dos poblaciones de *Spalacopus cyanus*. *Archivos de Biología y Medicina Experimentales*, 13:115.
- WAGLER, J. 1832. Mittheilungen über einige merkwürdige Thiere. *Isis*, Jena, 1832:1219–1220.
- WOOD, A. E., AND B. PATTERSON. 1959. The rodents of the De-seadan Oligocene of Patagonia and the beginnings of South American rodent evolution. *Bulletin of the Museum of Comparative Zoology*, 120:279–428.
- WOODS, C. A. 1982. The history and classification of South American rodents: reflections on the far away and long ago. Pp. 377–392, in *Mammalian biology in South America* (M. A. Mares and H. H. Genoways, eds.). Special Publication Series Pymatuning Laboratory of Ecology, University of Pittsburgh, 6:1–539.
- . 1993. Suborder Hystricognathi. Pp. 771–806, in *Mammal species of the world: a taxonomic and geographic reference*. Second ed. (D. E. Wilson and D. M. Reeder, eds.). Smithsonian Institution Press, Washington, District of Columbia, 1206 pp.
- ZULCH, R., L. E. WALKER, AND J. PINCHEIRA. 1982. Comparación de los cariotipos bandeados G y C de las formas costera y andina de *Spalacopus cyanus* y *Octodon degus* (Rodentia Octodontidae). *Archivos de Biología y Medicina Experimentales*, 15:164.

Editors of this account were ELAINE ANDERSON, J. ALDEN LACKEY, LESLIE N. CARRAWAY, KARI F. KOOPMAN, AND DUKE S. ROGERS. Managing editor was BARBARA H. BLAKE.

JUAN C. TORRES-MURA, MUSEO NACIONAL DE HISTORIA NATURAL, CASILLA 787, SANTIAGO, CHILE; LUIS C. CONTRERAS, COMISIÓN NACIONAL DEL MEDIO AMBIENTE, CASILLA 520-V, SANTIAGO 21, CHILE.
